# Supplementary material
Source: PubMed Central journal article supplement (PMC3718182)
Supplement: 1310131110_pnas.201310131SI.pdf [file 1310131110_pnas.201310131SI.pdf]

# Supporting Information

Neumann et al. 10.1073/pnas.1310131110

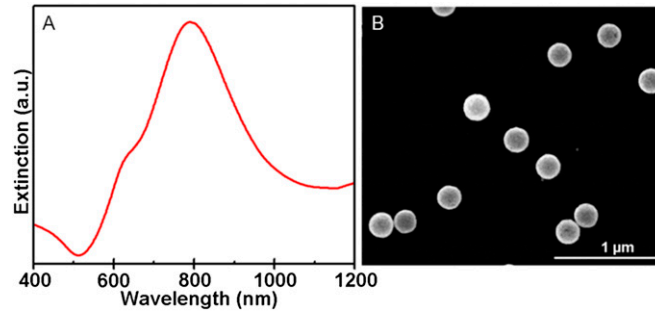

Fig. S1. (A) The extinction spectrum in water and (B) the SEM image of nanoshells. The nanoshell dimensions are  $[r_1, r_2] = [63, 75]$  nm.

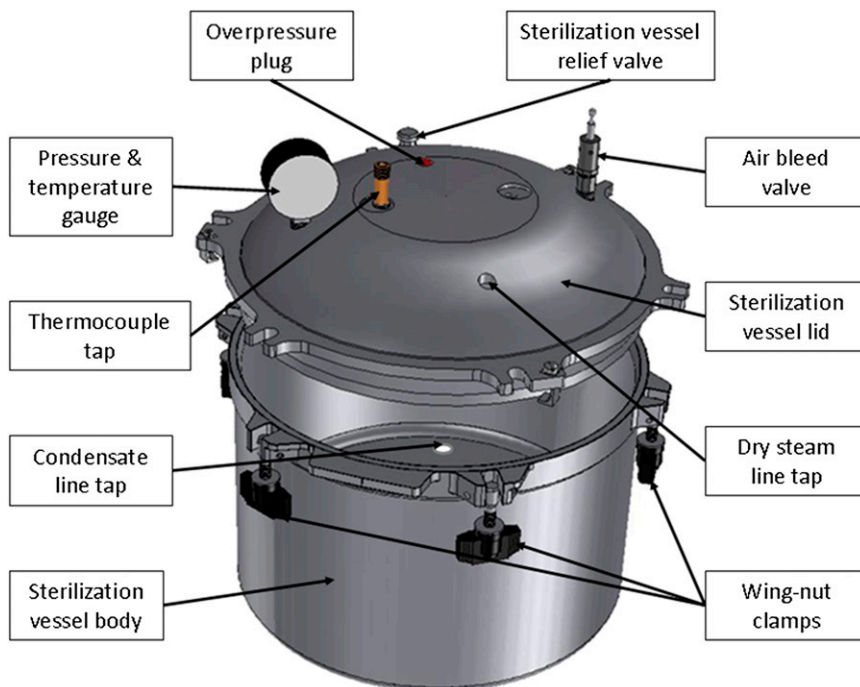

Fig. S2. The autoclave unit. The sterilization vessel is a slightly modified stovetop autoclave. It consists of a body, in which the volume is held, and the lid, which is threaded onto the body using a set of wing nuts. Steam is channeled through a specially machined port on the top of the lid, and the condensate is returned through the bottom of the vessel.

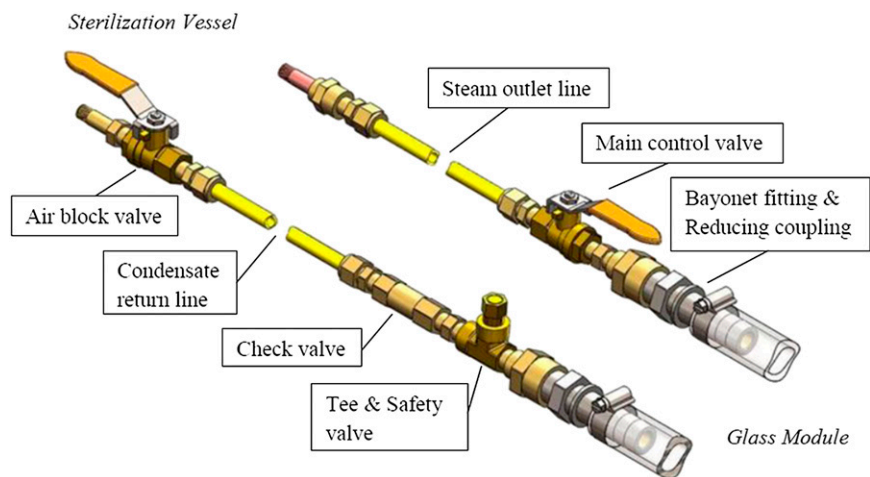

**Fig. S3.** The physical layout of the primary components that make up the connection system for the autoclave. The connection system is composed of the steam line leading from the glass module to the sterilization vessel and the condensate line leading from the bottom of the sterilization vessel to the glass sterilization vessel.
